# Supplementary material
Source: Springer Nature journal article supplement (https://www.springermedizin.de/resource/supplementary/12967_2014_1860_MOESM3_ESM.pdf/9575004)

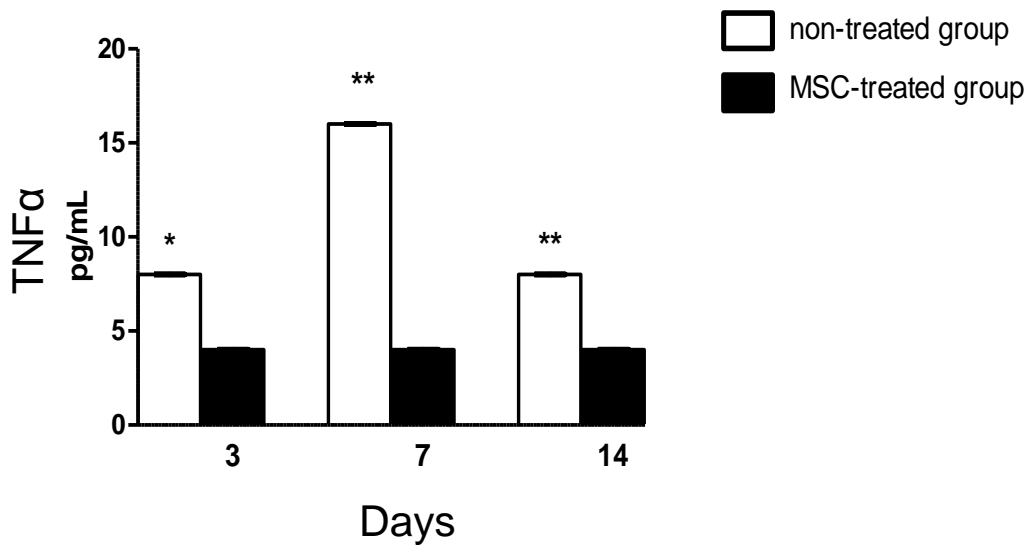

Supplement: MOESM3 [file 9575004]
